# Supplementary material for: Heavy atom free 1,1,4,4-tetraphenylbuta-1,3-diene with aggregation induced emission for photodynamic cancer therapy
Source: Royal Society of Chemistry journal article supplement (doi:10.1039/c9nj01331h), 2019-01-01
Supplement: c9nj01331h1.pdf [file c9nj01331h1.pdf]

## Supporting information

### Heavy atom free 1,1,4,4-tetraphenylbuta-1,3-diene with aggregation induced emission for photodynamic therapy

Huijuan Wen<sup>a</sup>, Juan Ma<sup>a</sup>, Jianjiao Chen<sup>b</sup>, Zhen Ke<sup>b</sup>, Dengfeng Zou<sup>\*b</sup>, Qiaoyun Li<sup>\*c</sup>

*a. The Third People's Hospital of Kunshan, Kunshan, Jiangsu, 215316, China, email:*

*b. School of Pharmacy, Guilin Medical University, Guilin 541004, Guangxi, P.R.*

*China. email: zdf1226@126.com*

*c. Department of Chemistry and Materials Engineering, Changshu Institute of Technology, Jiangsu, P.R. China Email: liqiaoyun61@126.com*

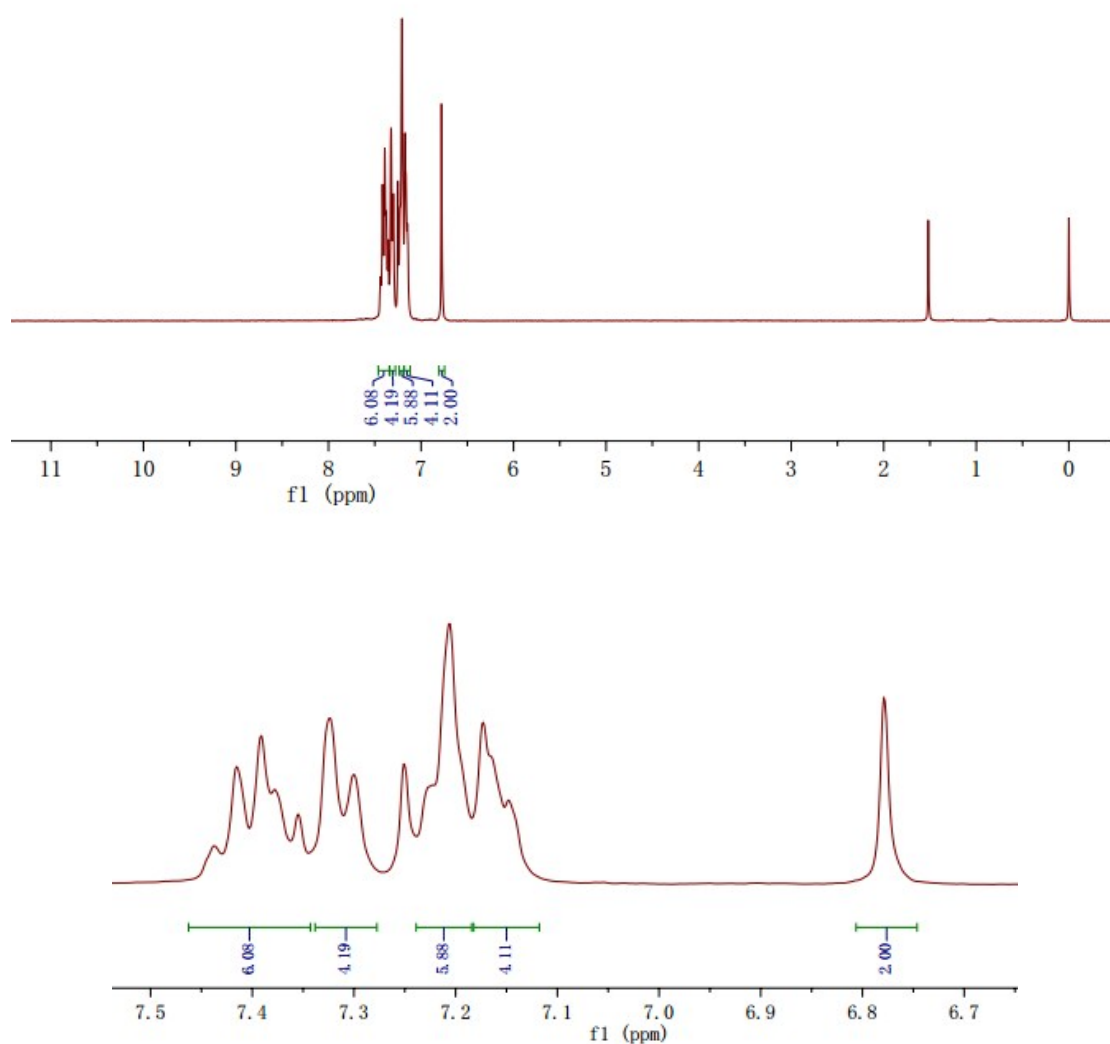

Figure S1 <sup>1</sup>H NMR spectrum of **TPD** in CDCl<sub>3</sub>

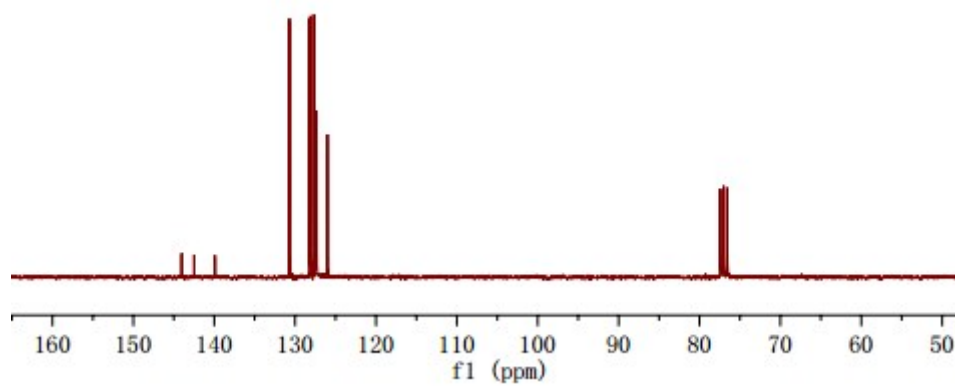

Figure S2  $^{13}\text{C}$ NMR spectrum of TPD in  $\text{CDCl}_3$
